# Supplementary material
Source: publisher figshare collection journal article supplement (https://acs.figshare.com/ndownloader/files/4203469)
Supplement: Supplementary file 1 [file 4203469]

## **Supplementary Information to the paper:**

### **Crystal structure, fluorescence and nanostructuration studies of a novel Zn<sup>II</sup> anthracene-based curcuminoid**

Núria Aliaga-Alcalde<sup>a\*</sup>, Laura Rodríguez<sup>b</sup>, Marilena Ferbinteanu<sup>c</sup>, Petra Höfer<sup>d</sup> and Thomas Weyhermüller<sup>d</sup>

<sup>a</sup> ICREA (Institució Catalana de Recerca i Estudis Avançats) & Universitat de Barcelona, Facultat de Química, Martí i Franquès, 1-11, 08028 Barcelona, Spain.

<sup>b</sup>Universitat de Barcelona, Facultat de Química, Martí i Franquès, 1-11, 08028 Barcelona, Spain. <sup>c</sup>University of Bucharest, Inorganic Chemistry Department, Dumbrava Rosie 23, Bucharest 020462, Romania. <sup>d</sup>Max-Planck Institut für Bioanorganische Chemie, P.O. Box 10 13 65, D-45413 Mülheim an der Ruhr, Germany.

## **List of contents:**

**Table S1.** Comparison of the crystallographic data and collection parameters of complexes **1** and **2**.

**Table S2.** Selected interatomic distances (Å) and angles (deg) for compound **1**.

**Table S3.** Comparison of the selected interatomic distances (Å) and angles (deg) of complexes **1** and **2**.

-----

**Figure S1.** <sup>1</sup>H NMR of free 9Accm in CDCl<sub>3</sub>. Comparison with <sup>1</sup>H NMR of compound **1**.

**Figure S2.** (a) Stick-style representation of [Zn(9Accm)<sub>2</sub>(py)] (**1**) molecules. (b) Spacefill representation of **1**. molecules Hydrogen atoms were removed for clarity. Carbon atoms are in grey, nitrogen in blue, oxygen in red and Zn atoms in dark yellow.

**Figure S3.** Electronic absorption spectra of compounds 9Accm and complexes **1** and **2** in 1·10<sup>-5</sup>M dichloromethane solutions.

**Figure S4.** Cyclic voltammograms at a scan rate of 100 mV/s in distilled CH<sub>2</sub>Cl<sub>2</sub> with 0.1 M (NBu<sub>4</sub>)PF<sub>6</sub> as electrolyte of 9Accm (black) and **1** (orange). Potential values referred to Fc/Fc<sup>+</sup>. Inset: cyclic voltammograms of **1** at a scan rate of 1000 mV/s.

**Figure S5.** Cyclic voltammograms of the reduction processes of complex **2** (green) at a scan rate of 100 mV/s in distilled CH<sub>2</sub>Cl<sub>2</sub> with 0.1 M (NBu<sup>n</sup><sub>4</sub>)PF<sub>6</sub> as electrolyte. Potential values referred to Fc/Fc<sup>+</sup>.

**Figure S6.** Cyclic voltammograms of the oxidation processes of complex **2** (green) at a scan rate of 100 mV/s in distilled CH<sub>2</sub>Cl<sub>2</sub> with 0.1 M (NBu<sup>n</sup><sub>4</sub>)PF<sub>6</sub> as electrolyte. Potential values referred to Fc/Fc<sup>+</sup>.

**Figure S7.** Cyclic voltammograms (orange, CV) and differential Pulse voltammogram (red, DPV) of the quasi-reversible reduction processes of complex **1** at a scan rate of 1000 mV/s in distilled CH<sub>2</sub>Cl<sub>2</sub> with 0.1 M (NBu<sup>n</sup><sub>4</sub>)PF<sub>6</sub> as electrolyte. Potential values referred to Fc/Fc<sup>+</sup>.

**Figure S8.** Normalized excitation spectrum of 9Accm in 1·10<sup>-5</sup>M dichloromethane solution ( $\lambda_{em} = 575$  nm).

**Figure S9.** Normalized excitation spectrum of **1** in 1·10<sup>-5</sup>M dichloromethane solution ( $\lambda_{em} = 575$  nm).

**Figure S10.** Normalized excitation spectrum of **2** in 1·10<sup>-5</sup>M dichloromethane solution ( $\lambda_{em} = 575$  nm).

**Figure S11.** AFM image of molecules of **1** on a graphite surface by dip-coating (500×500 nm); the graphite surface was immersed for few seconds in a solution of **1** in CH<sub>2</sub>Cl<sub>2</sub> (1.35·10<sup>-5</sup>M) and analysis of the height.

**Figure S12.** Measure of the size (different lengths) of one molecule of **1**.

**Figure S13.** Additional pictures using confocal spectroscopy.

#### **Molecular Orbital Diagrams from ADF calculations.**

**Figure S14.** The MO diagram for the [Cu(9Accm)<sub>2</sub>(py)] complex (in SP geometry and C<sub>2v</sub> symmetry) and the constituting fragments (metal ion and ligands). The red lines connect fragment orbitals with MOs containing them as major components. The lines in the left side between the *d* set and the complex identify the MOs assignable to the Ligand Field scheme.

**Figure S15.** The MO diagram for the [Zn(9Accm)<sub>2</sub>(py)] complex (in TBP geometry and C<sub>2</sub> symmetry) and the constituting fragments (metal ion and ligands). The absence of the lines between the *d* set and the complex MOs is due to the fact that the metal ion AOs are smeared in relatively small portions over many doubly occupied MOs, as expression of ionic character of the bonding.

## **MO components from ADF calculations assignable to Ligand Field Scheme**

### **Figures S16-1 to S16-5.**

**(Together with additional note)**

**Figure S17.** The rationalization of the TD-DFT transitions that are assignable to the Ligand Field spectrum of  $d^9$  configuration in  $[\text{Cu}(\text{9Accm})_2(\text{py})]$  compound idealized to  $C_{2v}$ . The data correspond to Time Dependent (TD) unrestricted DFT calculation with the B3LYP functional. The density difference map figured in the upper part can be assigned to  $d-d$  electron density displacement. The yellow area corresponds to the shape of the orbital from where the electron is moved and the blue one corresponds to its location after transition. In all the cases the blue area of density accumulation is placed in the equatorial plane, corresponding to the unpaired electron of the  $d^9$  set. Note that the sign of the orbitals is not retrieved in the density difference maps. The difference is taken as the full density of the excited state minus the full density of the ground state.

**(Additional table attached)**

### **Frontier Molecular Orbitals from unrestricted B3LYP calculations.**

**Figure S18.** The frontier MOs for the  $C_{2v}$  idealized  $[\text{Cu}(\text{9Accm})_2(\text{py})]$  from unrestricted DFT calculation with the B3LYP functional. The orbital assignable to the unpaired electron on the  $\text{Cu}^{\text{II}}$  ion, combined with in plane donor functions is placed at the position  $\alpha$  281. In principle, in the unrestricted frame, the  $\alpha$  and  $\beta$  orbital sets are independent, but except the supplementary  $d$ -type MO there is a good resemblance between couples of spinorbitals, such as  $\alpha_i$  is almost the same with  $\beta_{i-1}$  for labels  $i > 281$  and  $\alpha_i \cong \beta_i$  for  $i < 281$  lower orbitals.

**(Table attached)**

### **Spin density in ground and excited states of the Cu(II) complex.**

**Figure S19.** (a) Spin density in the groundstate of  $C_{2v}$  idealized  $[\text{Cu}(\text{9Accm})_2(\text{py})]$  and (b) an excited state with spin polarized nature (obtained by Broken Symmetry DFT) located at about  $20000 \text{ cm}^{-1}$ . The surfaces are drawn at  $0.0015 \text{ e}/\text{\AA}^3$ . The  $\alpha$  spin density is marked in blue, the  $\beta$  zones in green. In groundstate the total  $S_z = +1/2$  projection is cumulated in the coordination equatorial plane. In the excited state the equatorial plane carries a  $S_z = -1/2$  spin density, while the ligand part a triplet-like one,  $S_z = +1$  (the total spin projection being  $S_z = 1/2$ ).

**(Additional Note)**

### **Density Difference Maps for TD-DFT states.**

**Figure S20.** The density difference maps for TD-DFT states of the idealized  $[\text{Zn}(\text{9Accm})_2(\text{py})]$  complex with  $C_{2v}$  symmetry. View along the  $C_2$  axis. The representation corresponds to the total density of excited state minus the density at the

groundstate. The blue areas represent the zones where the density moves during the transition, the yellow ones corresponding to density depletion. All the cases correspond to  $^1A_1 \rightarrow ^1B_2$  transitions. The (a) diagram corresponding to the 13-th state and (b) to the 40-st one, in the series of computed TD-DFT levels. The wavelength ( $\lambda$ ) and relative intensity ( $f$ ) are marked near each panel.

**(Additional Note)**

**Figure S21.** The density difference map for the selected most intense transitions in the TD-DFT spectrum of the  $[\text{Cu}(\text{9Accm})_2(\text{py})]$  experimental structure (compound **2**). The states labelled with their order numbers, their energies and computed intensity ( $f$ ) are given below each inset. The blue areas represent the zones where the density moves during the transition, the yellow ones corresponding to density depletion.

**(Additional Note)**

**Figure S22.** The density difference map for the  $[\text{Zn}(\text{9Accm})_2(\text{py})]$  experimental structure (compound **1**).

**(Additional Note)**

**Table S1.** Comparison of the crystallographic data and collection parameters of complexes **1** and **2**.

|                                                                 | <b>1</b>                                           | <b>2</b>                                          |
|-----------------------------------------------------------------|----------------------------------------------------|---------------------------------------------------|
| <b>Formula</b>                                                  | C <sub>75</sub> H <sub>51</sub> NO <sub>4</sub> Zn | C <sub>75</sub> H <sub>51</sub> CuNO <sub>4</sub> |
| <b>FW</b>                                                       | 1095.54                                            | 1093.72                                           |
| <b>Space group</b>                                              | <i>C</i> 2                                         | <i>P</i> $\bar{1}$                                |
| <b><i>a</i>/Å</b>                                               | 23.545(16)                                         | 9.135(4)                                          |
| <b><i>b</i>/Å</b>                                               | 8.979(6)                                           | 11.707(5)                                         |
| <b><i>c</i>/Å</b>                                               | 13.021(9)                                          | 25.643(9)                                         |
| <b><math>\alpha</math>/deg.</b>                                 | 90.00                                              | 86.746(8)                                         |
| <b><math>\beta</math>/deg.</b>                                  | 91.567(15)                                         | 85.276(9)                                         |
| <b><math>\gamma</math>/deg.</b>                                 | 90.00                                              | 81.373(9)                                         |
| <b><i>V</i>/ Å<sup>3</sup></b>                                  | 2752(3)                                            | 2699.4(19)                                        |
| <b><i>Z</i></b>                                                 | 2                                                  | 2                                                 |
| <b><i>T</i>, K</b>                                              | 100(2)                                             | 100                                               |
| <b><math>\lambda</math>(MoK<math>\alpha</math>) Å</b>           | 0.71073                                            | 0.71073                                           |
| <b><math>\rho_{\text{calc}}</math>, Mg·cm<sup>-3</sup></b>      | 1.322                                              | 1.346                                             |
| <b><math>\mu</math>(MoK<math>\alpha</math>) mm<sup>-1</sup></b> | 0.502                                              | 0.461                                             |
| <b><i>R</i>1 [<i>I</i> &gt; 2<math>\sigma</math>(<i>I</i>)]</b> | 0.0638                                             | 0.0428                                            |
| <b><math>\omega R</math>2 (all data)</b>                        | 0.1284                                             | 0.1077                                            |

**Table S2.** Selected interatomic distances (Å) and angles (deg) for compound **1**.

|                           |           |                            |            |
|---------------------------|-----------|----------------------------|------------|
| <b>Zn(1)-O(19)</b>        | 1.977(4)  | <b>O(19)#-Zn(1)-O(17)#</b> | 89.67(18)  |
| <b>Zn(1)-O(19)#</b>       | 1.977(4)  | <b>O(17)-Zn(1)-O(17)#</b>  | 175.3(3)   |
| <b>Zn(1)-O(17)</b>        | 2.041(4)  | <b>O(19)-Zn(1)-N(41)</b>   | 126.06(13) |
| <b>Zn(1)-O(17)#</b>       | 2.041(4)  | <b>O(19)#-Zn(1)-N(41)</b>  | 126.06(13) |
| <b>Zn(1)-N(41)</b>        | 2.123(8)  | <b>O(17)#-Zn(1)-N(41)</b>  | 87.65(17)  |
| <b>O(17)-C(17)</b>        | 1.263(7)  | <b>O(17)-Zn(1)-N(41)</b>   | 87.65(17)  |
| <b>C(17)-C(18)</b>        | 1.389(9)  | <b>C(17)-O(17)-Zn(1)</b>   | 125.4(4)   |
| <b>C(18)-C(19)</b>        | 1.387(9)  | <b>O(17)-C(17)-C(18)</b>   | 124.0(6)   |
| <b>O(19)-C(19)</b>        | 1.292(7)  | <b>C(19)-C(18)-C(17)</b>   | 126.7(6)   |
| <b>O(19)-Zn(1)-(O19)#</b> | 107.9(3)  | <b>C(19)-O(18)-H(18)</b>   | 116.7      |
| <b>O(19)-Zn(1)-(O17)</b>  | 89.67(18) | <b>C(17)-C(18)-H(18)</b>   | 116.7      |
| <b>O(19)#-Zn(1)-(O17)</b> | 93.10(18) | <b>C(19)-O(19)-Zn(1)</b>   | 127.1(4)   |
| <b>O(19)-Zn(1)-(O17)#</b> | 93.10(18) | <b>O(19)-C(19)-C(18)</b>   | 124.4(6)   |

**Table S3.** Comparison of the selected interatomic distances (Å) and angles (deg) of complexes **1** and **2**.

|                           |            |                            |            |
|---------------------------|------------|----------------------------|------------|
| <b>Zn(1)-O(19)</b>        | 1.977(4)   | <b>O(19)#-Zn(1)-O(17)#</b> | 89.67(18)  |
| <b>Zn(1)-O(19)#</b>       | 1.977(4)   | <b>O(17)-Zn(1)-O(17)#</b>  | 175.3(3)   |
| <b>Zn(1)-O(17)</b>        | 2.041(4)   | <b>O(19)-Zn(1)-N(41)</b>   | 126.06(13) |
| <b>Zn(1)-O(17)#</b>       | 2.041(4)   | <b>O(19)#-Zn(1)-N(41)</b>  | 126.06(13) |
| <b>Zn(1)-N(41)</b>        | 2.123(8)   | <b>O(17)#-Zn(1)-N(41)</b>  | 87.65(17)  |
| <b>O(17)-C(17)</b>        | 1.263(7)   | <b>O(17)-Zn(1)-N(41)</b>   | 87.65(17)  |
| <b>C(17)-C(18)</b>        | 1.389(9)   | <b>C(17)-O(17)-Zn(1)</b>   | 125.4(4)   |
| <b>C(18)-C(19)</b>        | 1.387(9)   | <b>O(17)-C(17)-C(18)</b>   | 124.0(6)   |
| <b>O(19)-C(19)</b>        | 1.292(7)   | <b>C(19)-C(18)-C(17)</b>   | 126.7(6)   |
| <b>O(19)-Zn(1)-(O19)#</b> | 107.9(3)   | <b>C(19)-O(18)-H(18)</b>   | 116.7      |
| <b>O(19)-Zn(1)-(O17)</b>  | 89.67(18)  | <b>C(17)-C(18)-H(18)</b>   | 116.7      |
| <b>O(19)#-Zn(1)-(O17)</b> | 93.10(18)  | <b>C(19)-O(19)-Zn(1)</b>   | 127.1(4)   |
| <b>O(19)-Zn(1)-(O17)#</b> | 93.10(18)  | <b>O(19)-C(19)-C(18)</b>   | 124.4(6)   |
| <b>Cu(1)-O(19)</b>        | 1.924(2)   | <b>O(57)-Cu(1)-O(59)</b>   | 92.48(10)  |
| <b>Cu(1)-O(57)</b>        | 1.928(2)   | <b>O(17)-Cu(1)-O(59)</b>   | 88.08(10)  |
| <b>Cu(1)-O(17)</b>        | 1.932(2)   | <b>O(19)-Cu(1)-N(81)</b>   | 109.54(11) |
| <b>Cu(1)-O(59)</b>        | 1.943(2)   | <b>O(57)-Cu(1)-N(81)</b>   | 98.73(10)  |
| <b>Cu(1)-N(81)</b>        | 2.331(3)   | <b>O(17)-Cu(1)-N(81)</b>   | 89.44(10)  |
| <b>O(17)-C(17)</b>        | 1.272(4)   | <b>O(59)-Cu(1)-N(81)</b>   | 84.38(10)  |
| <b>O(19)-C(19)</b>        | 1.279(4)   | <b>C(17)-O(17)-Cu(1)</b>   | 126.0(2)   |
| <b>O(57)-C(57)</b>        | 1.285(4)   | <b>O(17)-C(17)-C(18)</b>   | 124.6(3)   |
| <b>O(59)-C(59)</b>        | 1.283(4)   | <b>O(19)-C(19)-C(18)</b>   | 123.9(3)   |
| <b>O(19)-Cu(1)-O57</b>    | 85.07(10)  | <b>C(57)-O(57)-Cu(1)</b>   | 124.6(2)   |
| <b>O(19)-Cu(1)-O17</b>    | 92.43(10)  | <b>O(57)-C(57)-C(58)</b>   | 124.7(3)   |
| <b>O(57)-Cu(1)-O17</b>    | 171.83(11) | <b>C(59)-O(59)-Cu(1)</b>   | 121.9(2)   |
| <b>O(19)-Cu(1)-O59</b>    | 166.07(11) | <b>O(59)-C(59)-C(58)</b>   | 124.7(3)   |

**Figure S1**

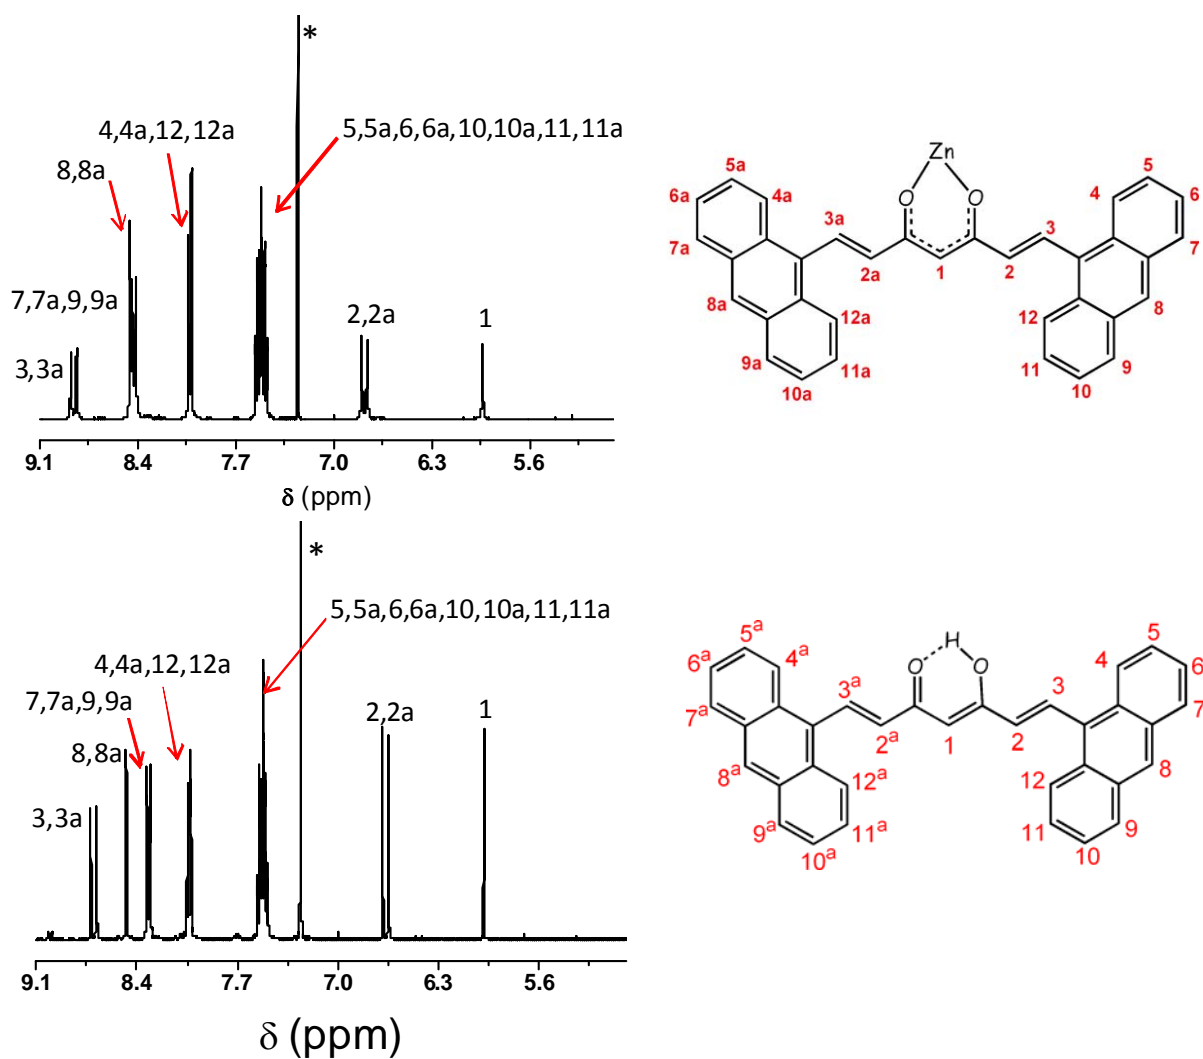

Protons labeled 2, 2a, 3, 3a, 7, 7a, 9 and 9a are ca. 0.15 ppm downfield shifted with respect to the free 9acm ligand.



**Figure S2**

**(a)**

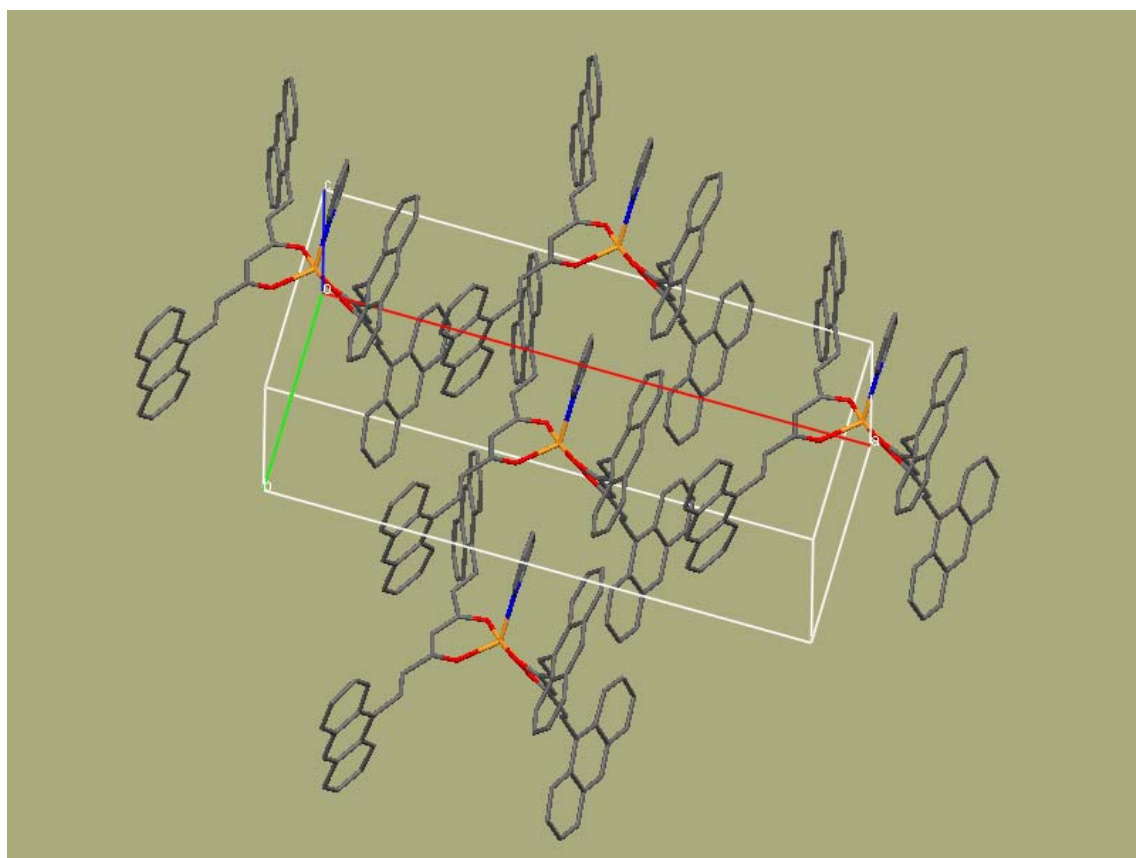

**Figure S2**

**(b)**

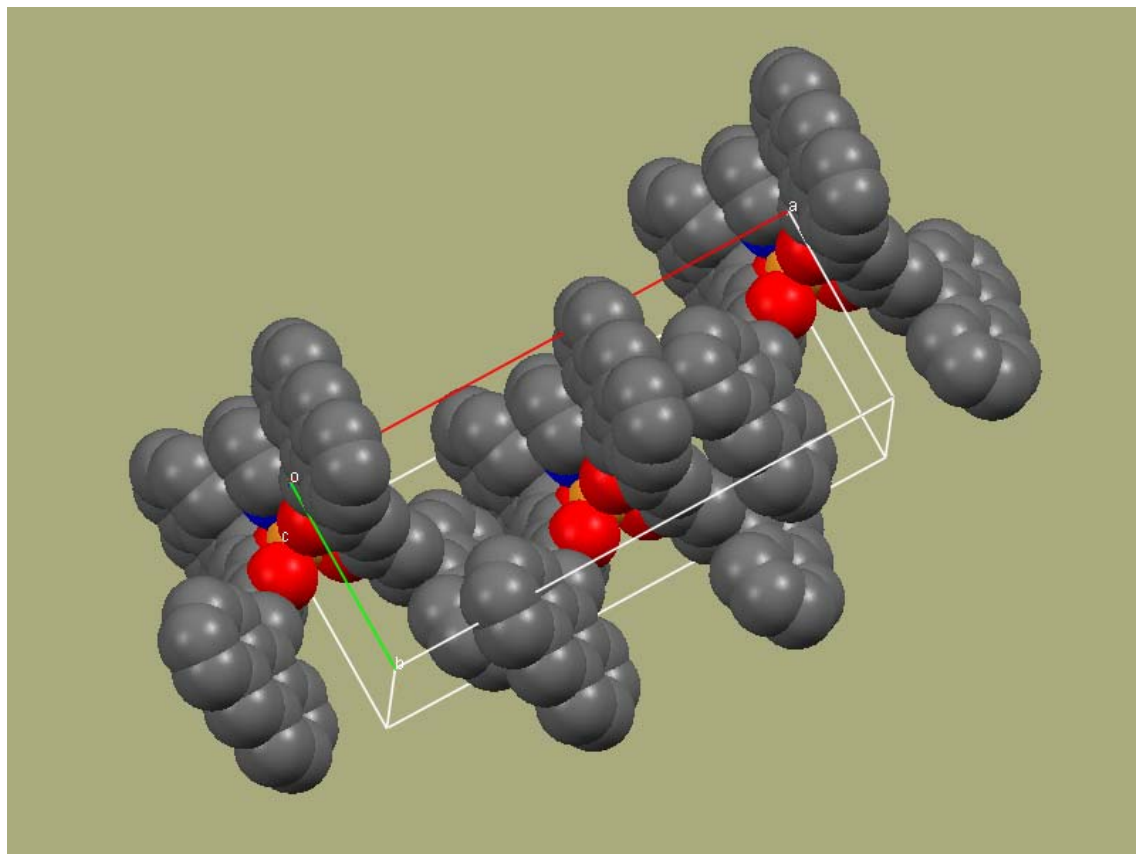

**Figure S3**

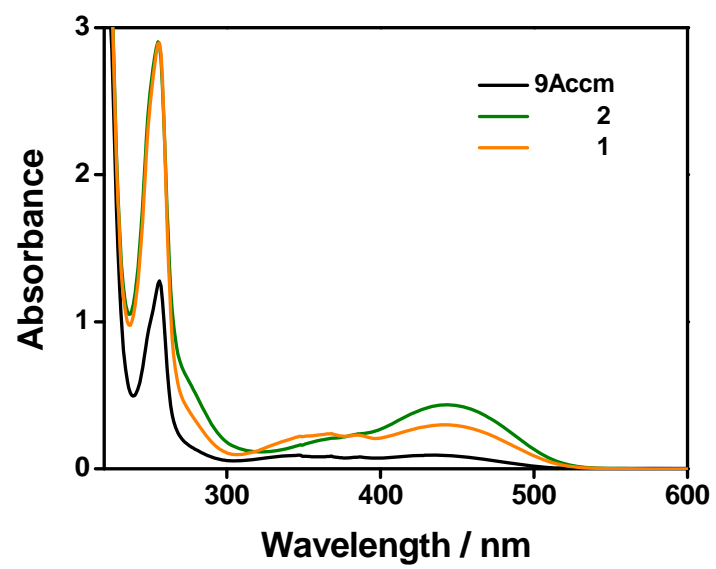

**Figure S4**

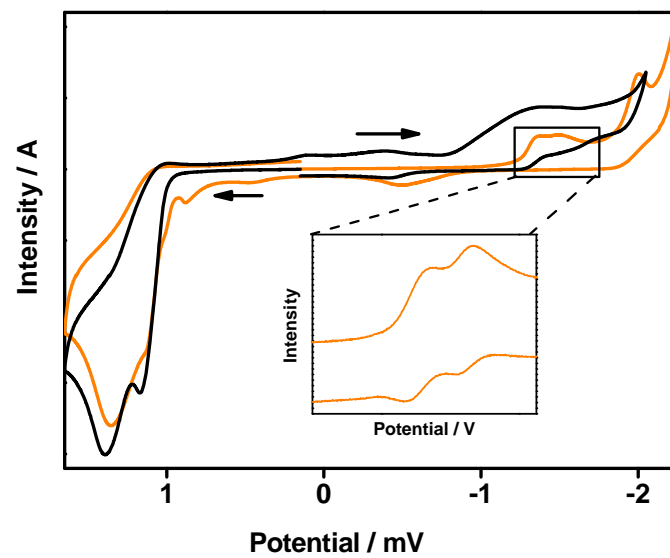

**Figure S5**

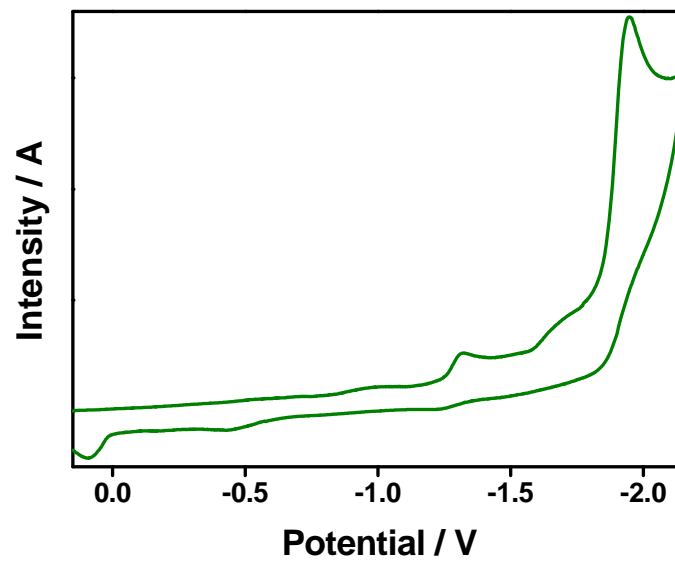

**Figure S6**

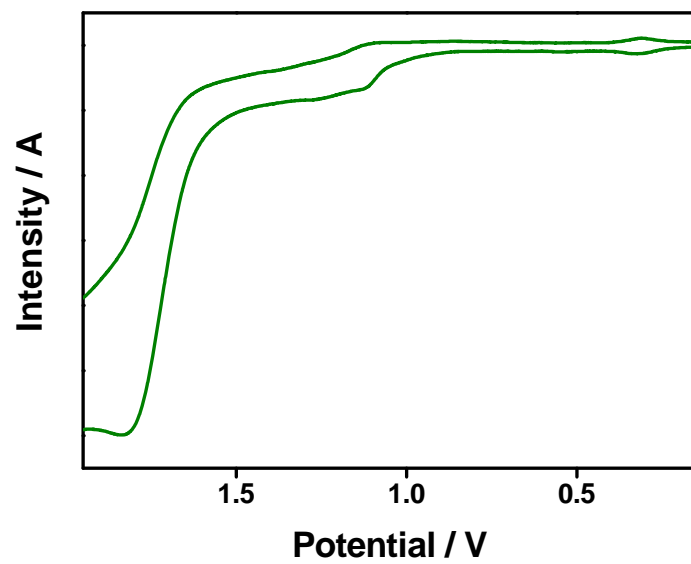

**Figure S7**

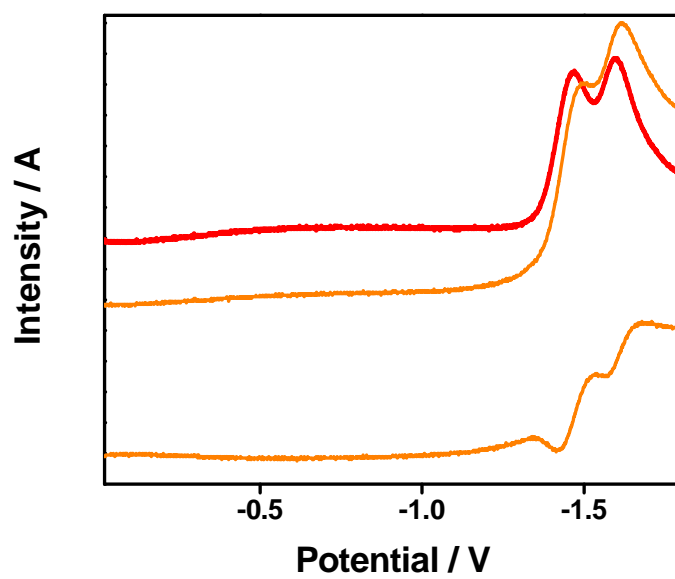

**Figure S8**

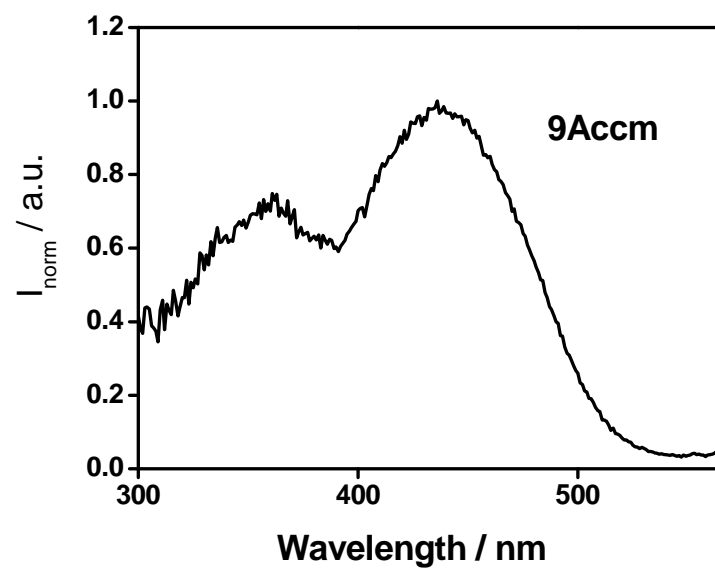

**Figure S9**

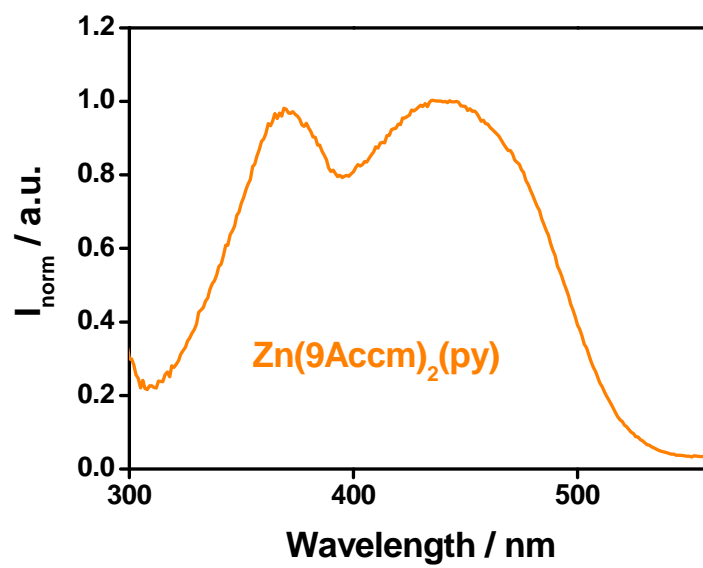

Figure S10

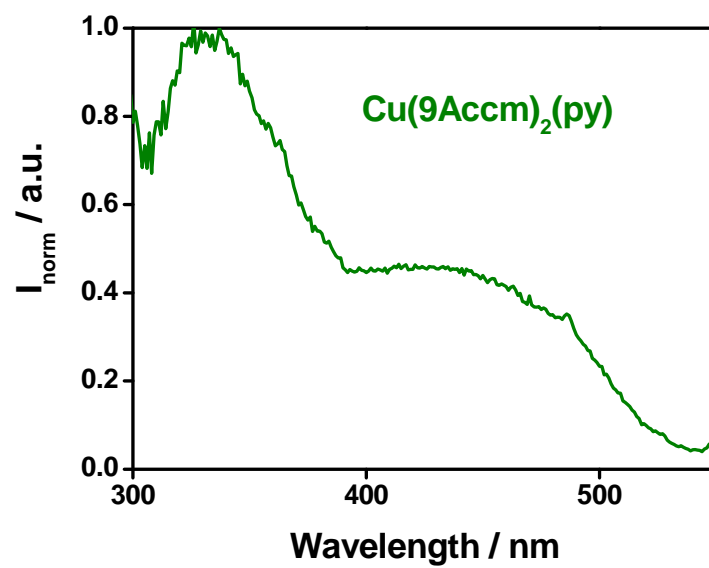

Figure S11

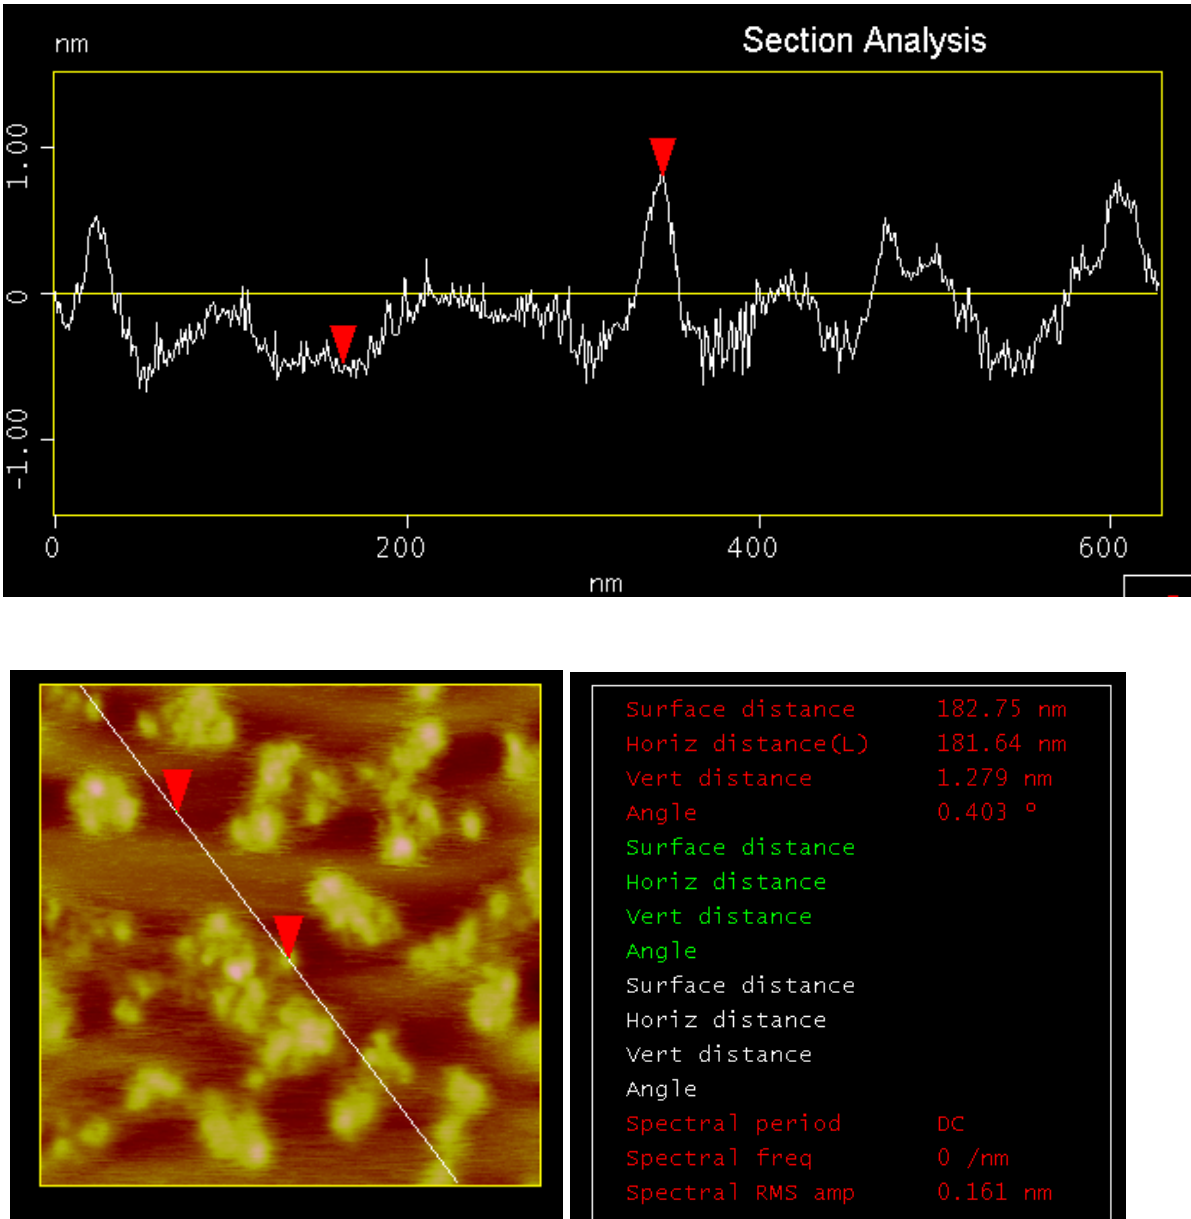



**Figure S12**

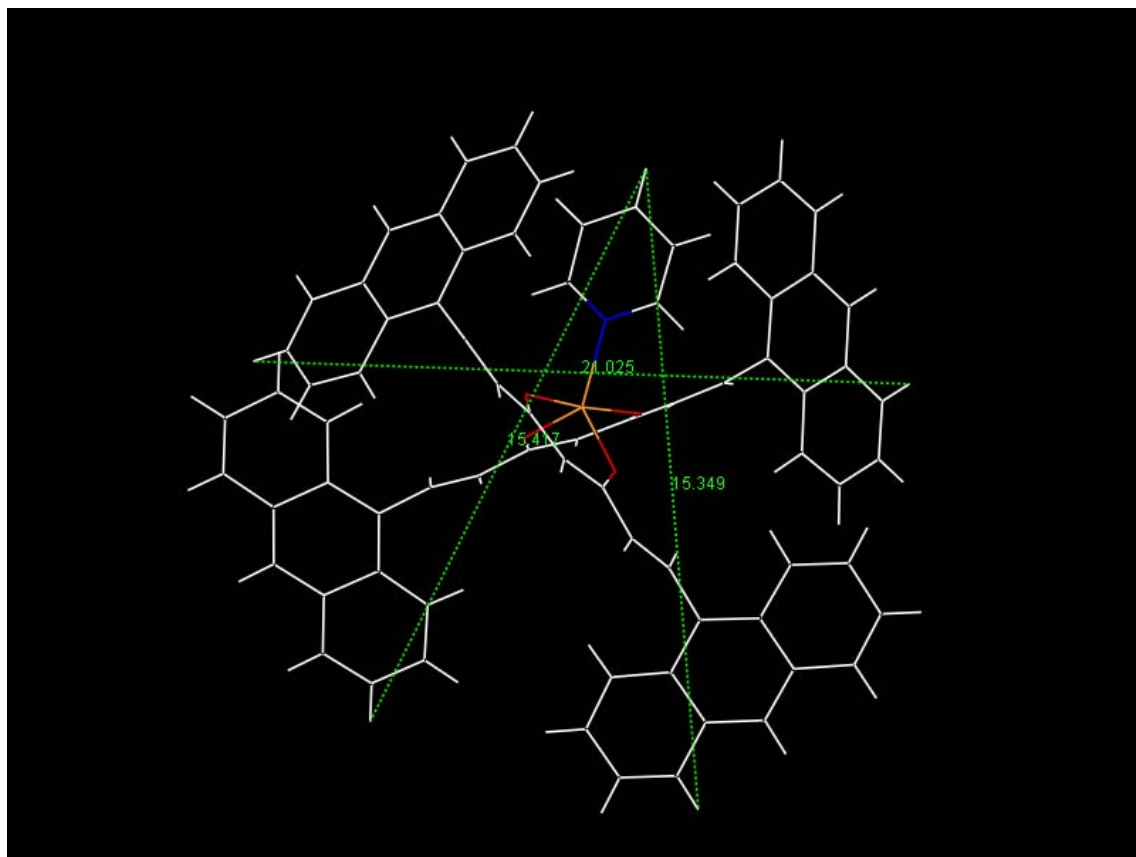

**Figure S13**

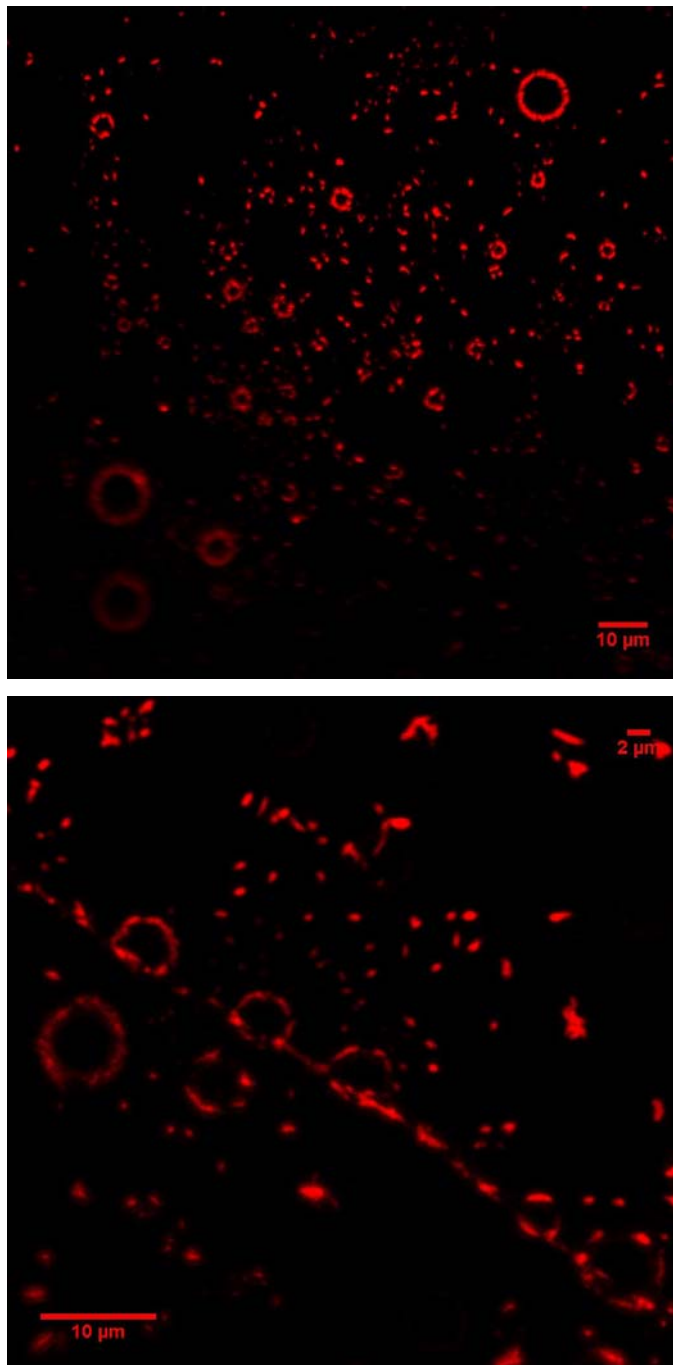

## Molecular Orbital Diagrams from ADF calculations.

Figure S14

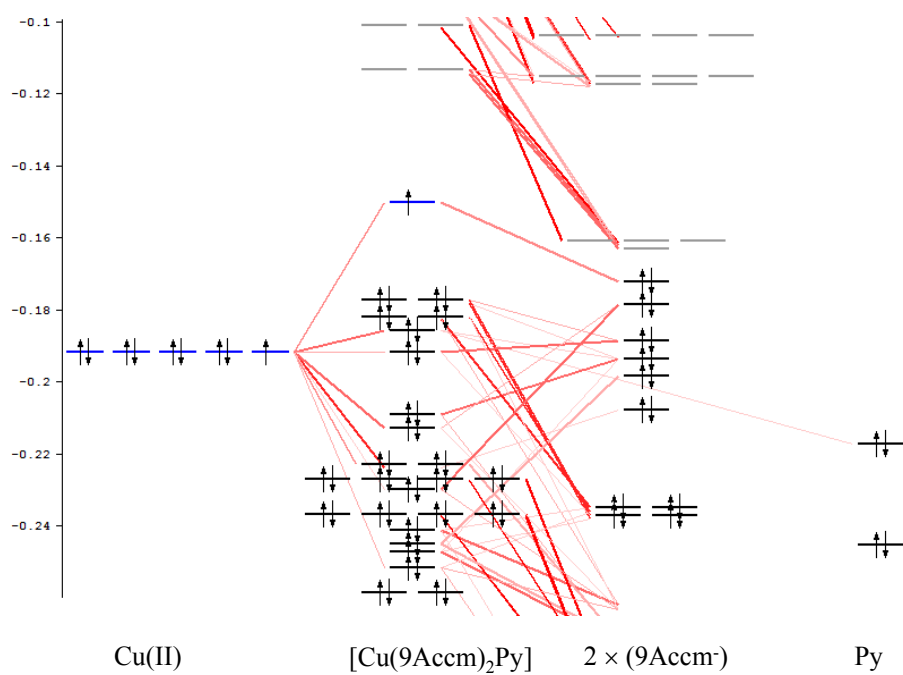

Figure S15

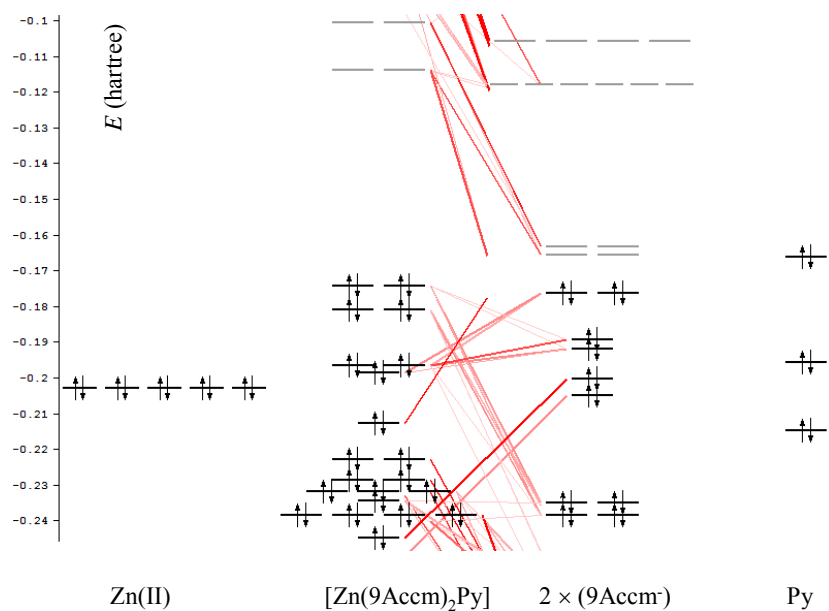

## MO components from ADF calculations assignable to Ligand Field Scheme

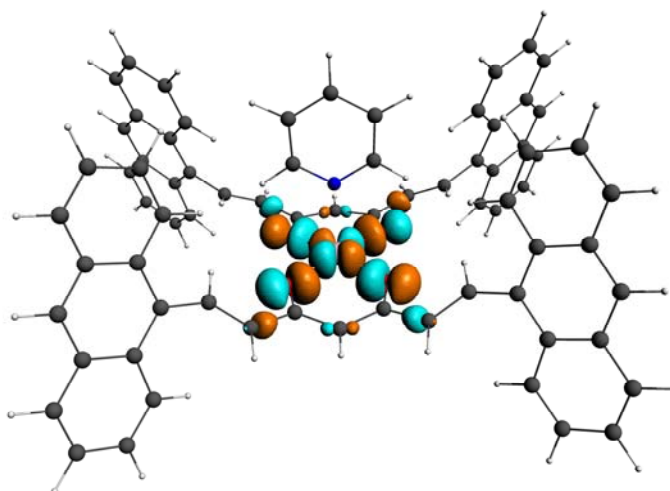

Fig. S16-1

| E(eV)  | Occ | MO    | %      | Fragment MO | Fragment                           |
|--------|-----|-------|--------|-------------|------------------------------------|
| -4.087 | 1   | 63 A2 | 47.24% | xy          | M                                  |
|        |     |       | 45.79% | 61 A2       | (9Accm <sup>-</sup> ) <sub>2</sub> |
|        |     |       | 2.47%  | 62 A2       | (9Accm <sup>-</sup> ) <sub>2</sub> |

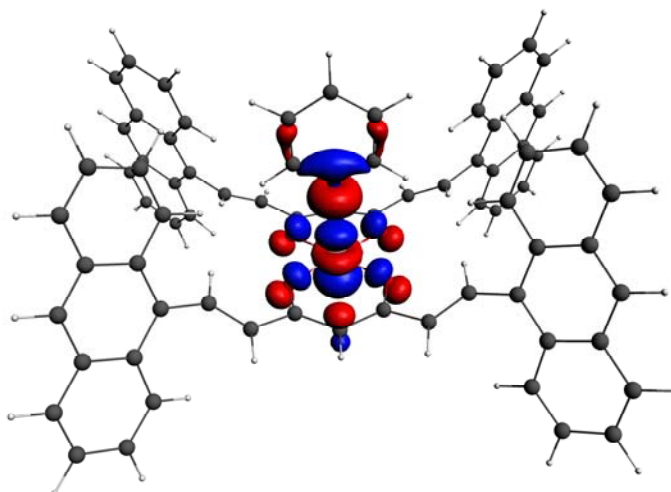

Fig. S16-2

| E(eV)  | Occ | MO    | %      | Fragment MO | Fragment                           |
|--------|-----|-------|--------|-------------|------------------------------------|
| -5.058 | 2   | 81 A1 | 52.66% | $z^2$       | M                                  |
|        |     |       | 19.48% | 11 A1       | py                                 |
|        |     |       | 11.94% | 64 A1       | (9Accm <sup>-</sup> ) <sub>2</sub> |
|        |     |       | 9.79%  | 63 A1       | (9Accm <sup>-</sup> ) <sub>2</sub> |
|        |     |       | 2.15%  | 62 A1       | (9Accm <sup>-</sup> ) <sub>2</sub> |

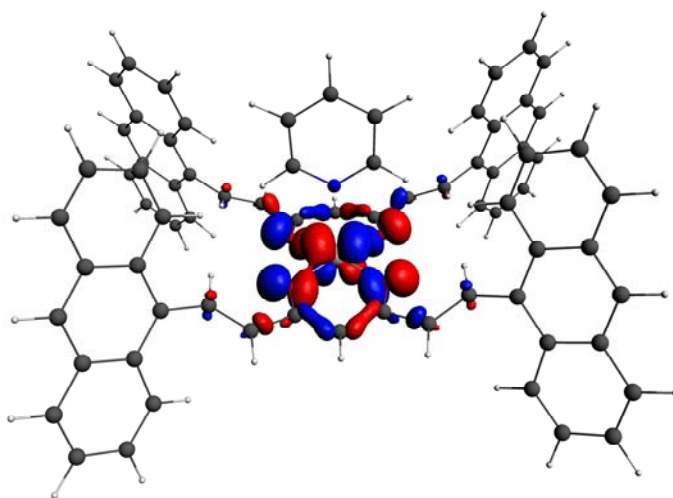

**Fig. S16-3**

| E(eV)  | Occ | MO    | %      | Fragment MO | Fragment                           |
|--------|-----|-------|--------|-------------|------------------------------------|
| -5.795 | 2   | 70 B2 | 52.29% | xz          | M                                  |
|        |     |       | 29.96% | 61 B2       | (9Accm <sup>-</sup> ) <sub>2</sub> |
|        |     |       | 11.79% | 59 B2       | (9Accm <sup>-</sup> ) <sub>2</sub> |
|        |     |       | 2.69%  | 60 B2       | (9Accm <sup>-</sup> ) <sub>2</sub> |
|        |     |       | 1.69%  | 62 B2       | (9Accm <sup>-</sup> ) <sub>2</sub> |

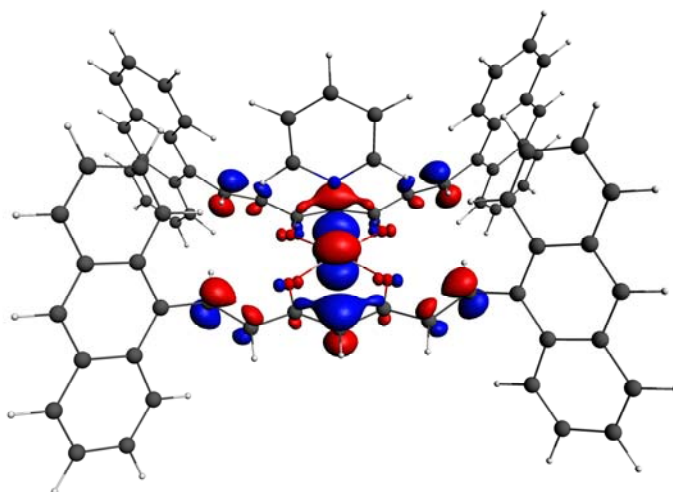

**Fig. S16-4**

| E(eV)  | Occ | MO    | %      | Fragment MO | Fragment                           |
|--------|-----|-------|--------|-------------|------------------------------------|
| -6.065 | 2   | 67 B1 | 46.74% | yz          | M                                  |
|        |     |       | 36.75% | 61 B1       | (9Accm <sup>-</sup> ) <sub>2</sub> |
|        |     |       | 9.15%  | 64 B1       | (9Accm <sup>-</sup> ) <sub>2</sub> |
|        |     |       | 4.43%  | 63 B1       | (9Accm <sup>-</sup> ) <sub>2</sub> |

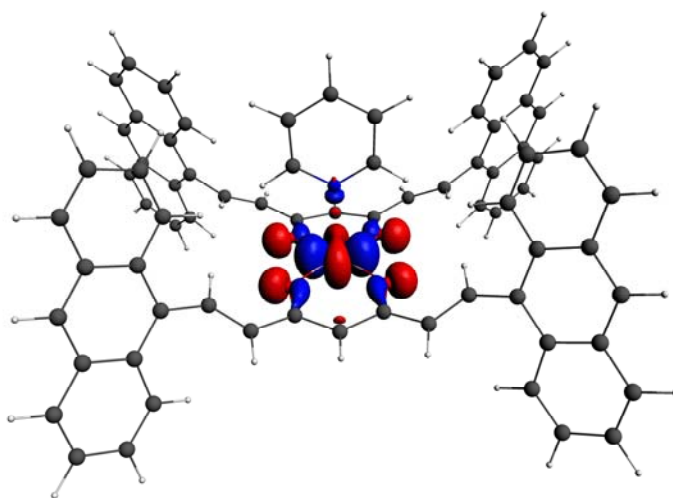

**Fig. S16-5**

| E(eV)  | Occ | MO    | %      | Fragment MO | Fragment  |
|--------|-----|-------|--------|-------------|-----------|
| -6.093 | 2   | 79 A1 | 73.96% | $x^2-y^2$   | M         |
|        |     |       | 13.22% | 63 A1       | 2'(9Accm) |
|        |     |       | 4.87%  | $z^2$       | M         |
|        |     |       | 3.14%  | 58 A1       | 2'(9Accm) |

Note that due to conventional axis choice specific to  $C_{2v}$  point group the  $d$  orbital label differ from standard denomination with respect of octahedral parentage. Because the x and y are pointing toward edges of the equatorial plane (not to vertices, as in textbook Ligand Field diagrams) the xy and  $x^2-y^2$  components are mutually switched. Thus, in the actual case the highest Ligand Field type MO, the carrier of unpaired electron is an  $a_2$  function preponderantly made of xy. In formal  $O_h$  reference this component is equivalent to the  $x^2-y^2$ .

The actual orbital ordering is  $a_1 < b_1 < b_2 < a_1 < a_2$ , which converted to the conventional notation of LF orbitals reads as follows:  $xy < xz < yz < z^2 < x^2-y^2$ .

The above MO pictures are given in the order of decreasing energy, the first MO picture corresponding to the carrier of the unpaired electron.

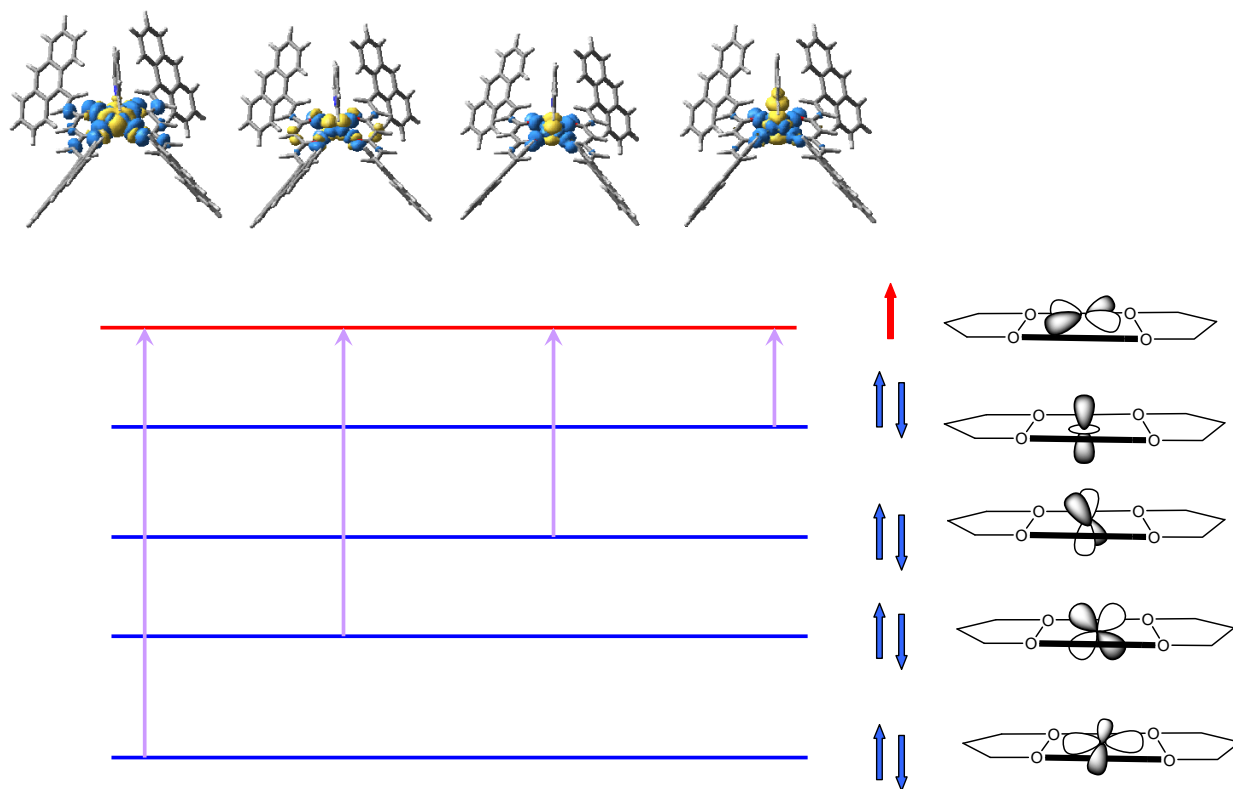

**Figure S17.**

Assignment, energy and wavelength of the TD-DFT excitations identified as Ligand Field type transitions.

| TD<br>transition<br>no. | Assignment                    | $E(\text{cm})$ | $\lambda(\text{nm})$ |
|-------------------------|-------------------------------|----------------|----------------------|
| 1                       | ${}^2A_2 \rightarrow {}^2A_2$ | 10810.7        | 925.0                |
| 7                       | ${}^2A_2 \rightarrow {}^2B_2$ | 13487.1        | 741.5                |
| 8                       | ${}^2A_2 \rightarrow {}^2B_1$ | 15585.1        | 641.6                |
| 9                       | ${}^2A_2 \rightarrow {}^2A_2$ | 16401.0        | 609.7                |

**Frontier Molecular Orbitals from unrestricted B3LYP calculations.**

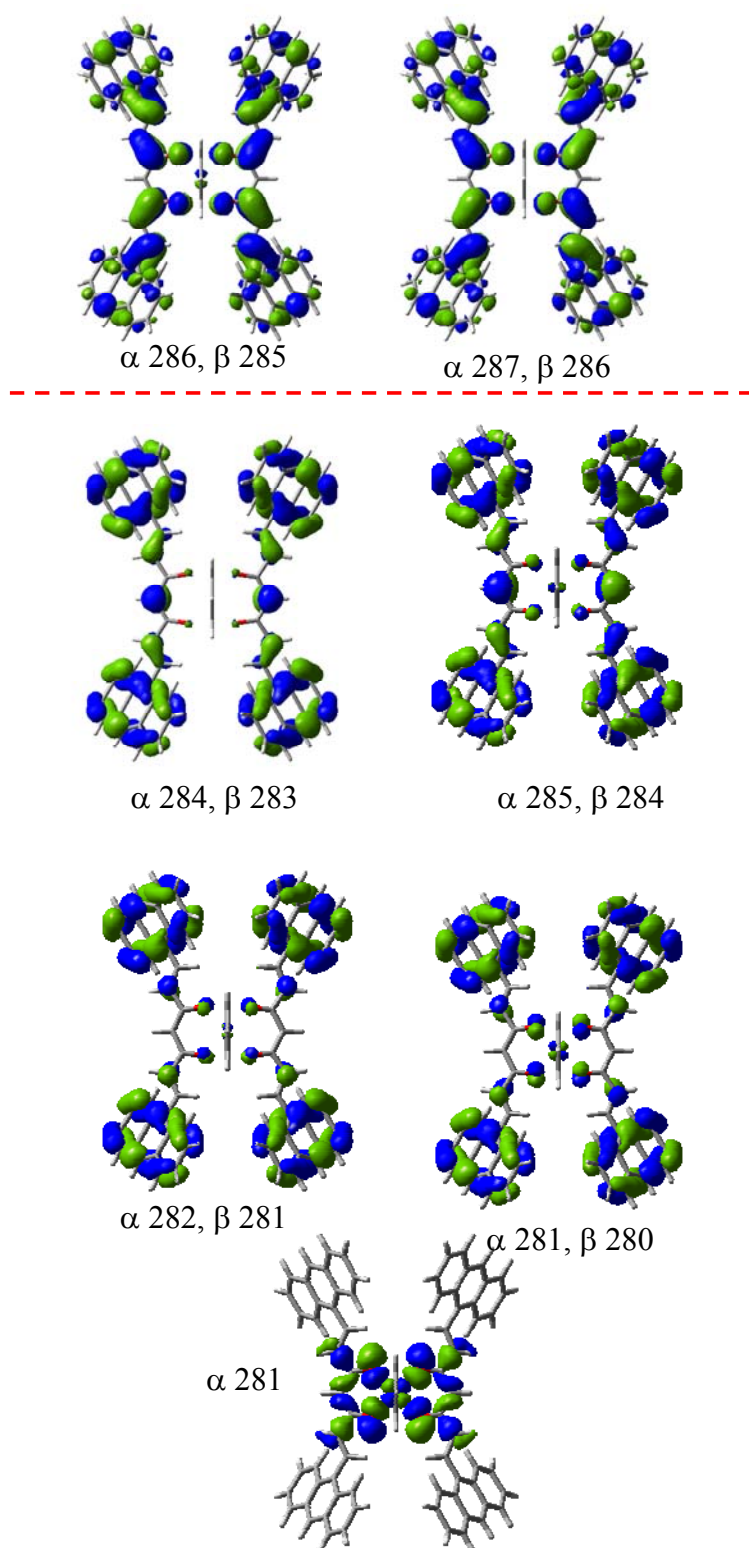

**Figure S18.**



The orbital promotions for the excited states discussed in main text and represented in Figure M1 are as follows:

Excited State 13

( $\lambda=483.75$  nm,  $f=1.20$  a.u.)

| Orbital promotion                       | Coefficient |
|-----------------------------------------|-------------|
| $\alpha$ 284 $\rightarrow$ $\alpha$ 286 | 0.60060     |
| $\alpha$ 285 $\rightarrow$ $\alpha$ 287 | 0.35029     |
| $\beta$ 283 $\rightarrow$ $\beta$ 285   | 0.45565     |
| $\beta$ 284 $\rightarrow$ $\beta$ 286   | 0.44539     |

Excited State 40

( $\lambda=399.5$  nm,  $f=0.16$  a.u.)

| Orbital promotion                       | Coefficient |
|-----------------------------------------|-------------|
| $\alpha$ 280 $\rightarrow$ $\alpha$ 287 | 0.59666     |
| $\alpha$ 282 $\rightarrow$ $\alpha$ 288 | -0.36283    |
| $\alpha$ 283 $\rightarrow$ $\alpha$ 289 | -0.17979    |
| $\beta$ 278 $\rightarrow$ $\beta$ 285   | -0.13722    |
| $\beta$ 279 $\rightarrow$ $\beta$ 285   | -0.16167    |
| $\beta$ 280 $\rightarrow$ $\beta$ 286   | 0.49532     |
| $\beta$ 281 $\rightarrow$ $\beta$ 287   | -0.25145    |
| $\beta$ 283 $\rightarrow$ $\beta$ 289   | 0.16289     |

### Spin density in ground and excited states of the Cu(II) complex.

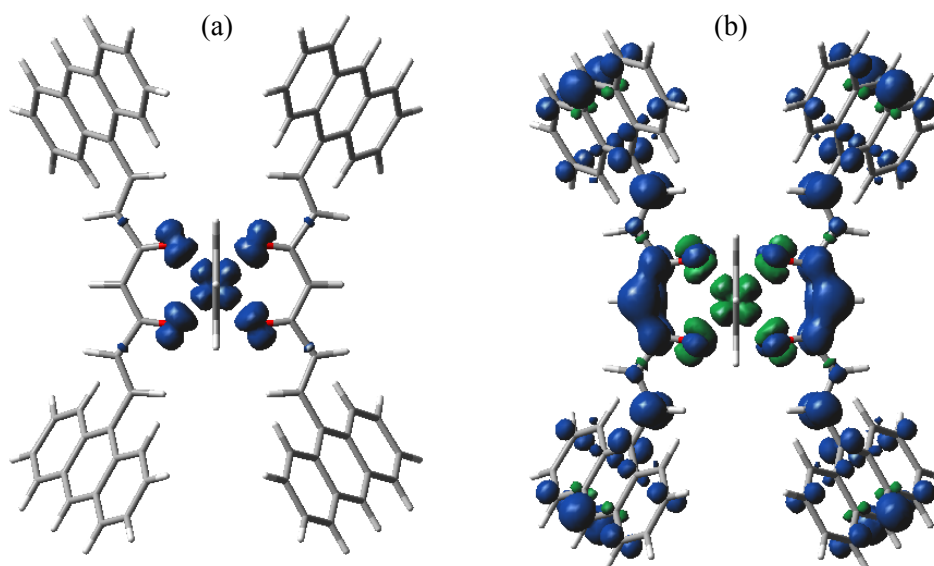

**Figure S19.**

Both states in Figure S17 have the same total spin projection (doublet type). The fact that the excited state is located nearby the TD-DFT state with the high intensity (see the text) responsible for absorption and potential luminiscence effects, supports the point that the spin coupling induces an enhanced configuration interaction coupling between the states of Cu(II) complex (in comparison to the Zn(II) hypothetic similar structure). This determines a possibility for non-radiative de excitation and the quenching of luminiscence. In order to get explicit spin density we used a Broken Symmetry DFT approach.<sup>1,2</sup>

<sup>1</sup> (a) Noodleman L, Norman JG (1979) J. Chem. Phys. 70: 4903; (b) Noodleman L (1981) J Chem Phys 74:5737. (c) L, Peng CY, Case DA, Mouesca JM (1995) Coord Chem Rev 144:199.

**Density Difference Maps for TD-DFT states.**

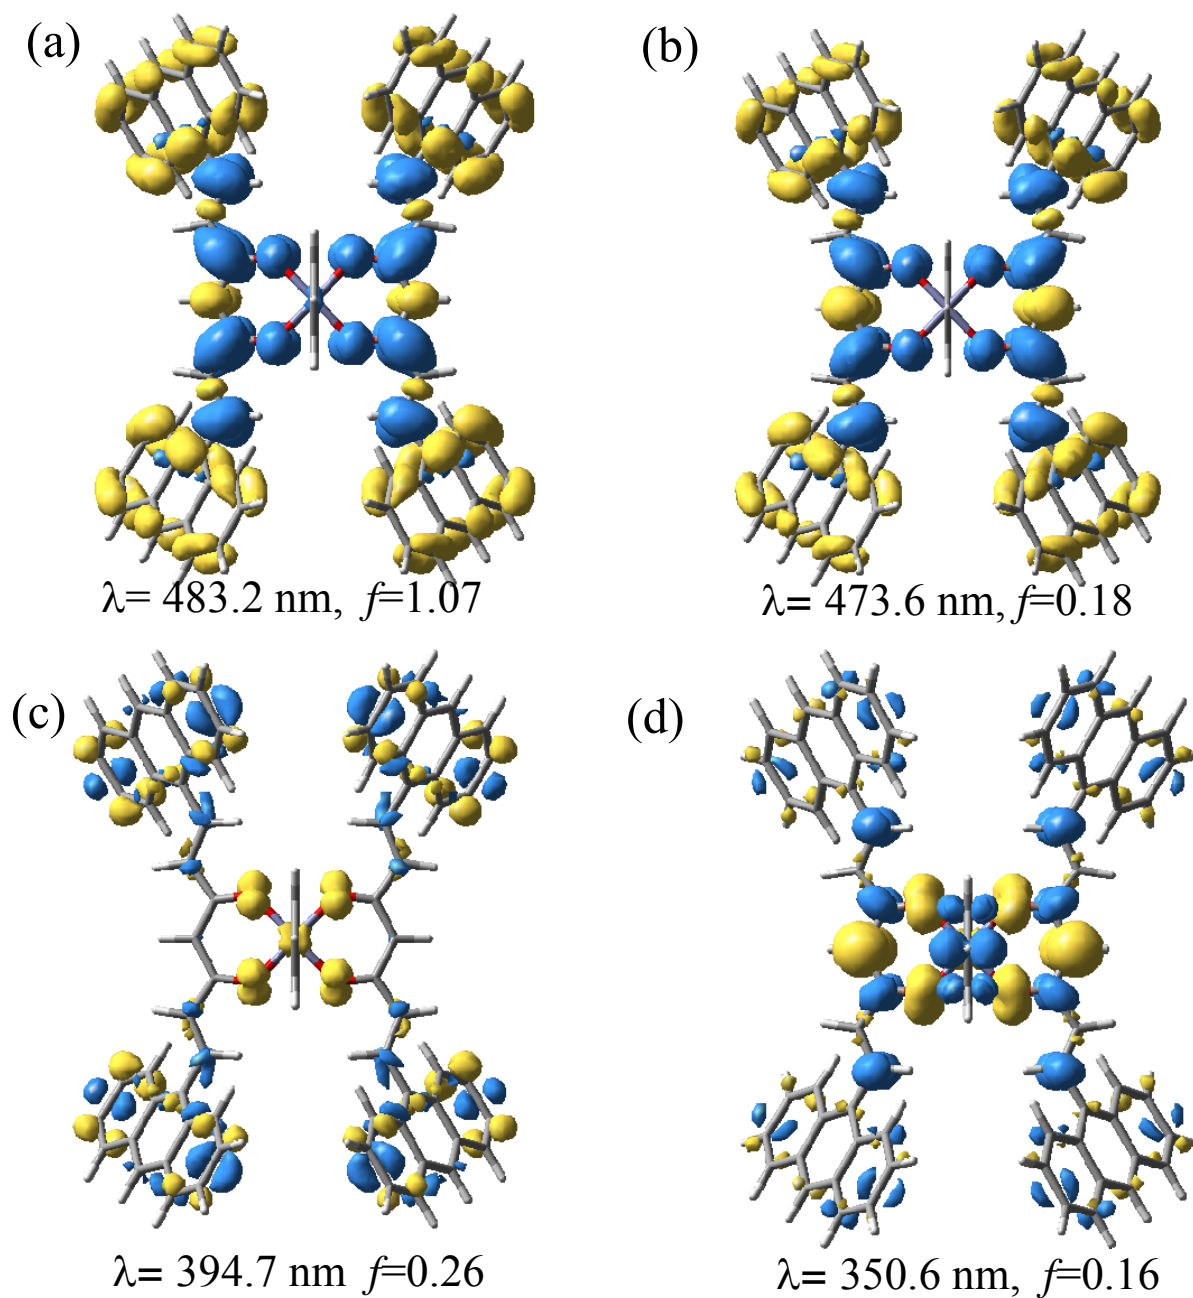

**Figure S20.**

<sup>2</sup> (a) Ruiz E (2004) Struct Bonding 113:71.(b) Ruiz E, Alemany P, Alvarez S, Cano J (1997) J Am Chem Soc 119:1297; Ruiz E, Cano J, Alvarez S, Alemany P, (1999) J Comput Chem 20:1391. (c) Daul CA, Ciofini I, Bencini A (2002) in Reviews of Modern Quantum Chemistry, part II (Ed.: K. D. Sen), World Scientific, Singapore, 1247.

In the following the density difference maps associated for the selected TD-DFT states computed at experimental structures of compound **1** and **2** will be presented.

For Cu(II) system, the first two intense transitions (#12 and #16) show like a transition from states located on anthracene fragments to the diketonate moieties of the ligands. There is a slight implication of the metal ion in this process. A higher intense transition #36 has the intriguing aspect of the intra-ligand charge transfer, namely between the two anthracene moieties.

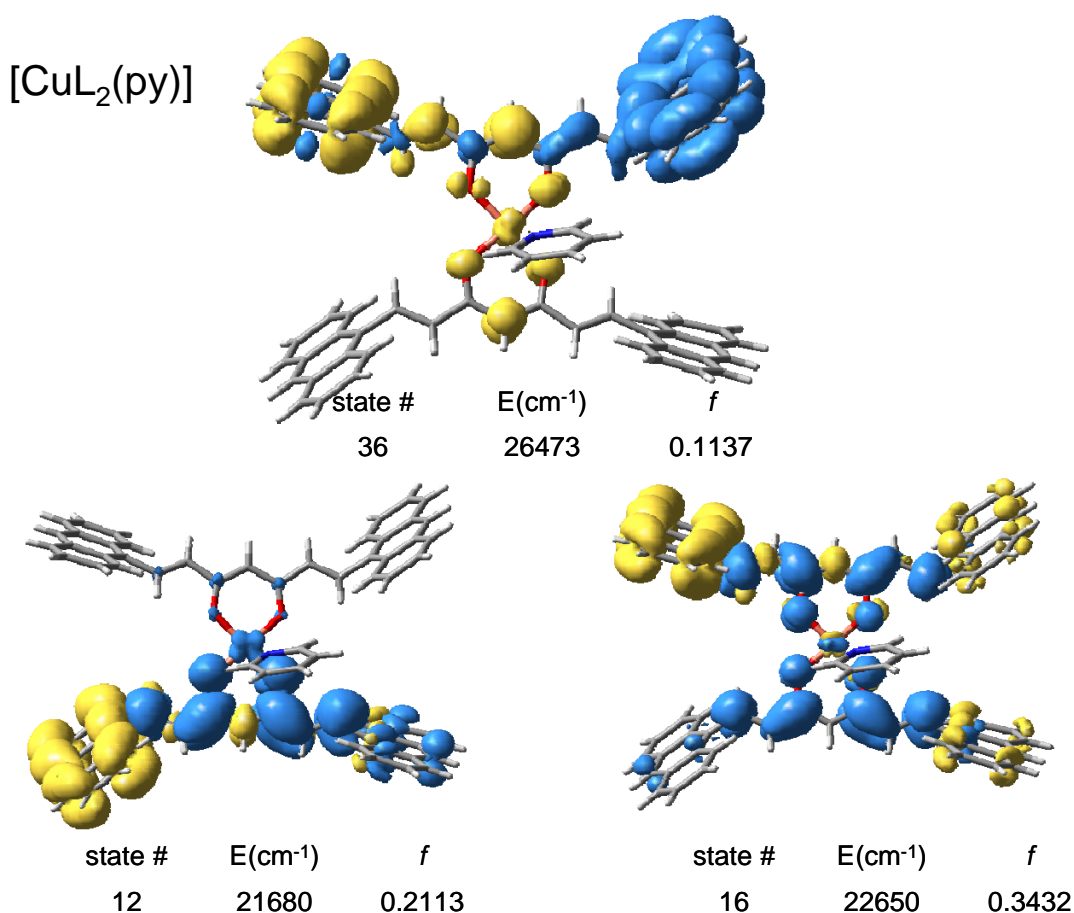

**Figure S21.**

The the Zn(II) system, the two intense bands (also the lowest excitations, #1 and #2) have both the aspect of a transition from anthracene aromatic part to diketonate. Moreover, the #1 and #2 processes have practically the same density difference map. This is related to the mentioned insensitivity of these maps to the phase of combined orbitals. Another couple of states show more complicates aspect of intra-ligand processes.

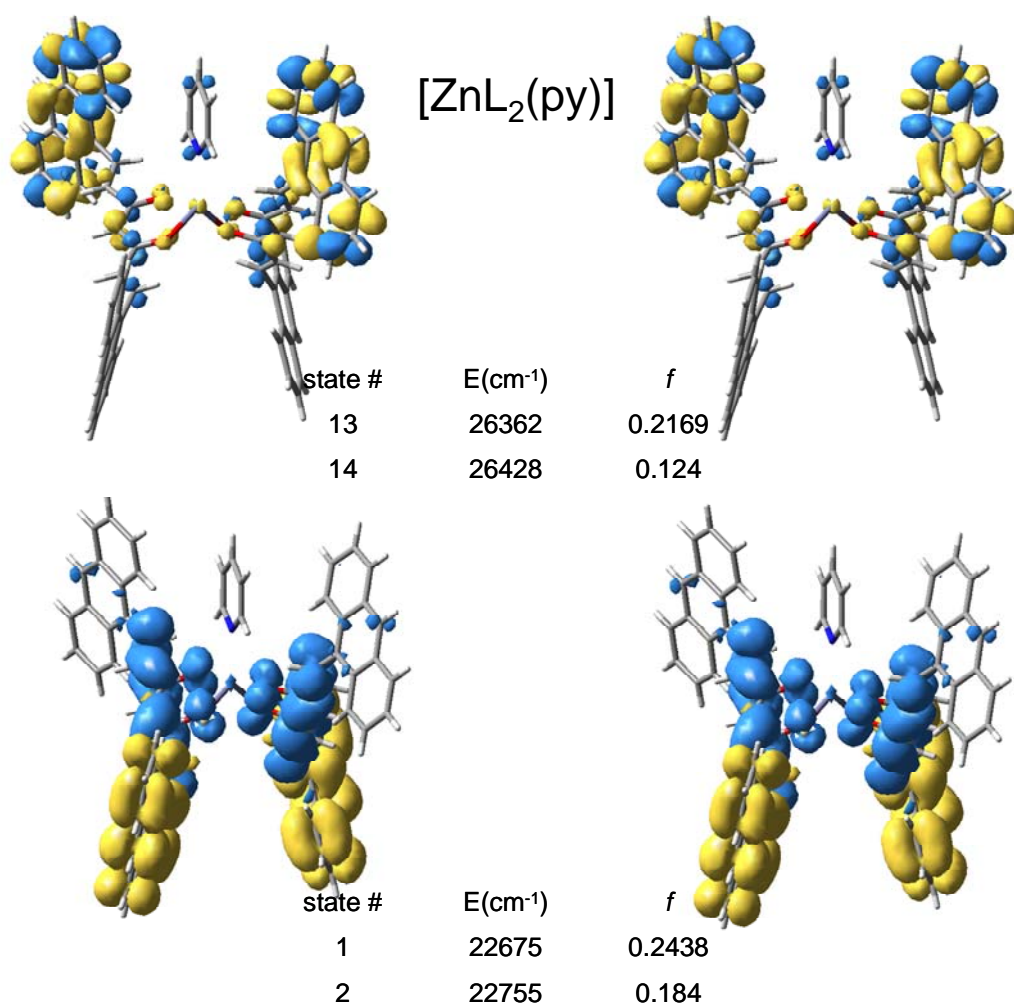

**Figure S22.**

While a stable and a general feature of the all systems seems to be related, with a transition between anthranyl and diketonate moieties, the higher active bands are sensitive to details of mutual placements of the ligands or with respect of the mutual orientation of the anthracene fragments in the same ligand. The slight differences between the anthracene groups decide which actual one is more active in a given process.
